# Supplementary material
Source: PubMed Central journal article supplement (PMC3552515)
Supplement: NIHMS338808-supplement-Supplement1.pdf [file NIHMS338808-supplement-Supplement1.pdf]

## Supplementary Appendix

This appendix has been provided by the authors to give readers additional information about their work.

Supplement to: Chimowitz MI, Lynn MJ, Derdeyn CP, et al. Stenting versus aggressive medical therapy for intracranial arterial stenosis. *N Engl J Med* 2011;365:993-1003. DOI: 10.1056/NEJMoa1105335.

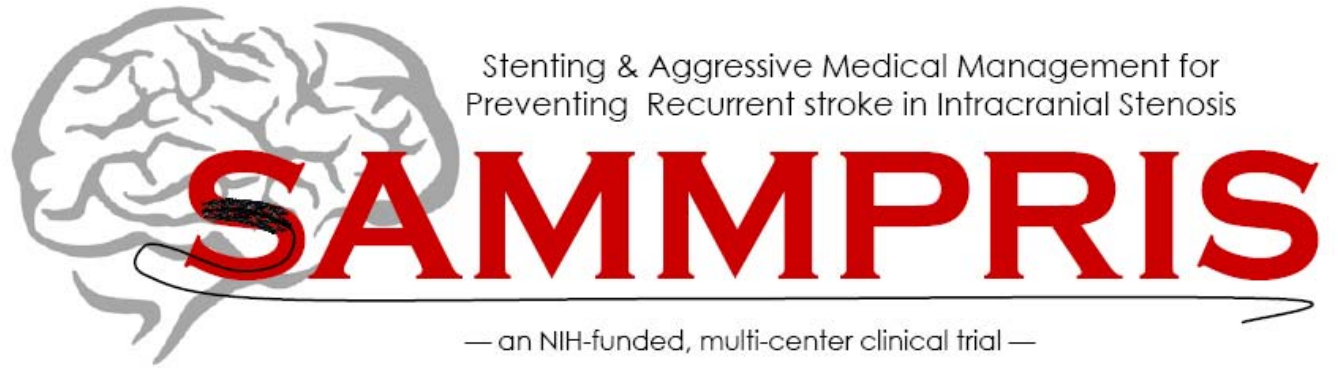

## **Online Appendix: Table of Contents**

- 1. Administrative Structure and Participants**
- 2. Figure of Patient Enrollment and Follow-up in the Trial**
- 3. Expanded Version of Table 2 in the Manuscript Showing Risk Factor Measures at Baseline, 30 Days, 4 Months and 1 Year**

## **Appendix. Administrative Structure and Participants**

*Executive Committee* - M Chimowitz, C Derdeyn, D Fiorella, M Lynn, T Turan, B Lane, J Malloy, S Janis (NIH/NINDS member)

*Site Representatives on Steering and Publication Committees\** - H Lutsep, S Barnwell, M Waters, B Hoh, M Hourihane, E Levy, A Alexandrov, M Harrigan, D Chiu, R Klucznik, J Clark, C McDougall, M Johnson, L Pride, M Torbey, S Zaidat

*Operations Committee* - M Chimowitz, M Lynn, T Turan, B Lane, J Malloy, J Montgomery, S Swanson, J Cleveland, A Nizam

*Clinical Coordinating Center (CCC)* - M Chimowitz, T Turan, B Lane, J Malloy, Department of Neurosciences, Medical University of South Carolina, Charleston, SC.

*Statistical Coordinating Center (SCC)* - M Lynn, J Montgomery, A Nizam, G Cotsonis, S Swanson, J Cleveland, L Lu. Department of Biostatistics, Emory University, Rollins School of Public Health, Atlanta, GA.

*Imaging Center* - C Derdeyn, B Vendt, Mallinckdrodt Institute of Radiology, Washington University, St.Louis, MO

*Central Neuroradiologists* - H Cloft \*\*, Z Rumboldt

*Neurology Adjudication Committee* - L Caplan, D Anderson, R Hart, R Bernstein

*Cardiology Adjudication Committee* - T O'Brien, G Hendrix, E Powers, S Chiaramida

*Risk Factor Advisory Committee* - T Turan, B Egan, M Lopes-Virella, K Hermayer, A Le, O Benavente, C White, M Chimowitz, W. Virgil Brown, B Lane

*Interventional Credentialing Committee* - C Derdeyn, D Fiorella, S Barnwell, J Dion, P Meyers, P Gobin, S Zaidat, B Lane (non-voting), M Chimowitz (non-voting)

*Conflict of Interest Committee* - M Williams, C Case, G Lanzino

*National Institutes of Health/National Institute of Neurological Disorders and Stroke Liaison* – C Moy, W Koroshetz

*Safety Monitors* - B Stern, G Zoarski

*Data and Safety Monitoring Board (DSMB)* - J Grotta (Chair), D Hess, M Johnson, J Verter

*Research Assistants* - J Kandl, M Steiner, A Stufflebean, N Vilardo

**Clinical Sites** (highest enrolling sites listed first)

*Oregon Health Sciences University* - S Barnwell, H Lutsep, B Petersen, G Nesbit, W Clark, J Fields, A Har-el, D Larsen, S Enochs, K Feest, B Dugan, S Jamieson

*University of Florida* - B Hoh, M Waters, B Miller, A Khanna, T Sheehan, L Carlton, R Boyette, N Wilson

*State University of New York at Buffalo* - E Levy, A Siddiqui, M Hourihane, R Sawyer, C Ionita, M Donovan, A Crumlish, M Hartney

*University of Alabama* - M Harrigan, A Alexandrov, J Rothrock, I Lopez, D Patterson, L Cava, T Taylor, L Nelson, B Casey, K Albright

*The Methodist Hospital Houston* - R Klucznik, O Diaz, D Chiu, J Ling, J Volpi, D McCane, L Katz

*Barrow Neurological Institute*- C McDougall, F Albuquerque, D Fiorella, J Clark, M Flaster, J Frey, G Moguel-Cobos, S Ladha, B Kasel, J Cacciola, S Porter, C Kelly, N Honea, H Jahnke

*The University of Texas Southwestern Medical Center at Dallas* - L Pride, P Purdy, B Welch, M Johnson, J Lee, R Novakovic, C Hall, K Johnson

*Medical College of Wisconsin* - O Zaidat, M Torbey, D Book, J Lynch, B Fitzsimmons, A Helms, C Pierzchalski, J Delap, C Miller, E Brandenburg

*Riverside Methodist Hospital, Columbus*- R Budzik, P Pema, G Eubank, K Johnson, N Sample, M Taylor, W Metz, L Allison, T Campbell, K Tanner, A Garcia, A Bailey

*Wayne State University* - S Chaturvedi, A Xavier, K Rajamani, C Ranganathan, R Madhavan, F Mada, K Sawaya, L Palm, D Murray, D Vaphiadis

*Medical University of South Carolina* - A Turk, M Chimowitz, T Turan, I Chaudry, R Turner, R Adams, N Papamitsakis, A Walker, G Starr, E Debenham, J Garry, J Peterson

*MultiCare / Tacoma General Hospital* - B Kott, J Huddleston, A Nohara, L Lynam, Y Zhu, M Barnhart, C Holsey

*Moses Cone Health System* - S Deveshwar, P Sethi, C Dohmeier, Y Yan, M Reynolds, K Willis, C Weymann, D Champey, W Hickling, W Harbison, D Parker, A Howard, S Hammonds, A Overton, T Goodpasture, P Henderson, C Martin

*State University of New York at Stony Brook* - H Woo, D Fiorella, C Perkins, L Donarummo, M Guido, L Krupp, P Coyle, O Gerber, S Fiore, D Madigan, M Baumeister, V Geronimo, D McHugh

*Forsyth Medical Center* - D Heck, C Chase, A Runheim, H Kraft, J Dodds, D Norwood, Y Whitley, T Browning, M Burdette

*West Virginia University* - A Rai, C Brooks, C Nance, L Gutmann, P Altemus, J Domico, M Power, T Weimer, R Whitescarver

*Cleveland Clinic* - P Rasmussen, T Masaryk, R Gupta, I Katzan, K Uchino, J Gebel, M Hussain, M Lu, C Bae, J Provencio, D Andrews-Hinders, T Wheeler, L Strozniak, N Tighe

*Henry Ford Medical Center* - M Kole, P Mitsias, A Katramados, A Russman, B Silver, N Sripathi, J Jones

*Florida Hospital, Orlando* - F Hellinger, D Honeycutt, L Bilanovic, B Brutsch, K Beaudry

*University of Pittsburgh* - T Jovin, V Reddy, L Weschler, B Jankowitz, S Zaidi, M Horowitz, R Lin, M Hammer, M Jumaa, S DeCesare, D Crowley-Lisowski, A Adams, J Oakley, J Billigen

*St. Luke's Episcopal Hospital, Houston* - M Mawad, H Morsi, E Bershada, J Suarez, G Lopez, S Moore, M Pierce, G DeFreitas

*Columbia University Medical Center* - P Meyers, M Elkind, J Willey, J Roberts, T Corporan

*University of Mississippi Medical Center* - R Buciu, H Uschmann, R Leacock, E Brumfield, M Bankston

*Emory University* - F Tong, F Nahab, J Dion, C Cawley, M Frankel, R Gupta, R Noguera, A Webb, L Ayala, K Hanson, E Holland

*University of Miami* - D Yavagal, J Romano, M Aziz-Sultan, M Katsnelson, S Koch, I Bustillo, M Lichtenberger

*Weill Medical College of Cornell University* - Y Gobin, D Leifer, H Riina, M Fink, D Jamieson, A Segal, H White, J Caronna, B Nikolov, K Salvaggio, M Velcheva, M Ogg

*Rush University Medical Center* - D Lopes, S Prabhakaran, V Lee, M Shanks, M Catalano, G Griffin, T Cole, C Woods

*University of Pennsylvania* - R Hurst, S Kasner, J Weigele, B Cucchiara, S Messe, N Shafi, M Mullen, D Rose, I Rybinnik, L Sansing, M McGarvey, E Augelli, M DeSanto, N Gallatti, L Ventura, J Luciano

*University of Cincinnati* - T Abruzzo, A Ringer, P Khatri, D Kanter, M Flaherty, S Kempisty, K Sullivan, C Moore, L Sprafka, C Koenig, B Reinert

*Central DuPage Hospital* - H Shownkeen, A Mazumdar, H Echiverri, R Bajwa, K Dzamashvelli, R Sucholeiki, J Smith, S Lidtke, P Pastore

*Case Western Reserve University* - R Tarr, J Sunshine, C Sila, E Westbrook, M DeGeorgia, S Pundik, S Sundararajan, A Furlan, D Korosec, D Diorio

*Cedars Sinai Medical Center* - M Alexander, D Palestrant, P Lyden, C Miller, R Singh, C Serrano, E Ferguson, F Lin, P Kornbluth, T Zorge

*Duke University Medical Center*- T Smith, C Graffagnino, V Chilukuri, J Stoner, D Bombard

*Erlanger Medical Center*- B Baxter, D Rankine, T Devlin, D Jones, J Sparks, D Gaddis

*Baylor Medical Center, Dallas* - I Thacker, J Hise, D Graybeal, R Choudry, A Okai, E Broyles, M Johnson, R Smith, M Sams

*Sacred Heart Medical Center* - C Zylak, M Geraghty, T Powell, W Bender, E Rawner, R Franks, B Aaron, T Cantrell

*Thomas Jefferson University* - R Rosenwasser, P Jabbour, C Pineda, R Bell, D Brock, D August, E Simons, A Salvatore, M Wakefield, M Sheridan, K Salgado

*Scott & White Memorial Hospital* - W Lesley, R Lenehan, J Clark, R Wardlow, B Wulbrecht, M Carney, S Taggart

*Glendale Adventist Medical Center* - G Rappard, D Thompson, L Lee, C Galicia, J Cann, I Zoltzman, A Ghosalkar

*Providence Medical Center, Southfield, MI* - R Fessler, J Mick, B Kole, B Silverman, P Cullis, M Holtzman, N Warra, Y, Will- Murphy, M Silverman, K Telck, V Gordon, J Kelly, M Lahey, N Zakem, C Rieck

*Carolinas Medical Center* - J Bernard, S Dibert, J Story, J Martin, M Price

*Sentara Medical Center* - J Agola, R Zweifler, J Rathbun, S Cummings

*Massachusetts General Hospital* - J Pryor, S Silverman, R Nogueira, F Buoanno, M Ning, A Singhal, N Rost, B Rista, A Chutinet

*Inova Fairfax Medical Center* - R Pergolizzi, C Putman, J Cochran, R Lipsky, R Benson, J Rosecan, M Greenberg, K John, C Restak, M Khalil, B Wyllie

*University of California San Francisco* - R Higashida, M Nguyen- Huynh, J Tatum, S Poisson, J Scanlon, C Yancey, S Stason

*Good Samaritan Hospital, San Jose* - R Malek, H Sachdev, N Sacchdev, M Emami, U Kelly-Tolley

*Mayo Clinic Arizona* - B Chong, B Demaerschalk, M Aguilar, D Dodick, T Ingall, B Vargas, K Noe, J Sirven, J Drazkowski, E Boyd, J Wieser

*Johns Hopkins University* - P Gailloud, R Wityk, P Nyquist, B Kohler, A Jones

*Washington University, St Louis* - C Moran, C Derdeyn, D Cross, D Carpenter, A Ford, J Lee, A Zazulia, N Hantler, J Newgent, J Rickmann, J Serna, L Carpenter

*Washington Hospital, Washington, DC* - W Bank, A Liu, A Hsia, M Lin, M Schlosberg, J Martin, M Cota, I Fleming

\* neurologists and interventionists from the top 8 enrolling sites

\*\* On Steering and Publication Committees

# SAMMPRIS

## Patient Enrollment and Follow-up

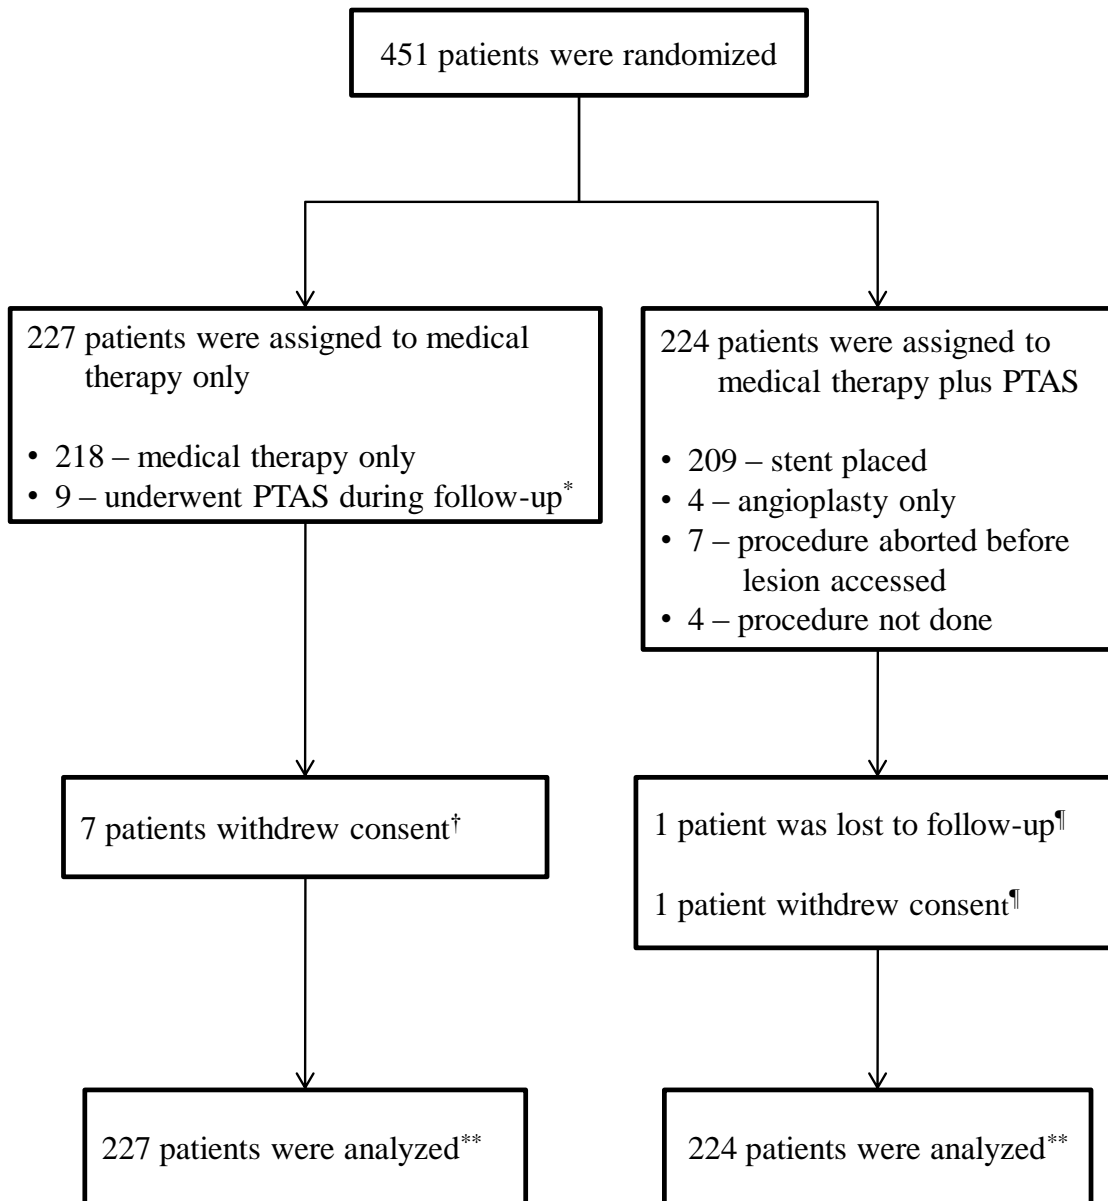

\* Days after enrollment when PTAS done: 4, 28, 68, 79, 98, 117, 198, 250, 429

† Medical Therapy Only : Days after enrollment when withdrawn: 2, 3, 3, 30, 86, 121, 231

¶ PTAS: Days after enrollment when lost or withdrawn: 236, 279

\*\* For the time to event analyses, patients who withdrew consent or were lost to follow-up were censored at the last contact date.



**Table 2. Risk Factor Measures at Baseline and During follow-up**

| Variable               | Medical Group (N=227) |              |              |                     | PTAS Group (N=224) |              |              |                     |
|------------------------|-----------------------|--------------|--------------|---------------------|--------------------|--------------|--------------|---------------------|
|                        | Baseline              | 30 Days      | 4 Months     | 1 Year              | Baseline           | 30 Days      | 4 Months     | 1 Year              |
| <b>Clinical Status</b> |                       |              |              |                     |                    |              |              |                     |
| Blood pressure–mmHg    |                       |              |              |                     |                    |              |              |                     |
| No. evaluated          | n=227                 | n=216        | n=179        | n=104               | n=220              | n=213        | n=173        | n=109               |
| Systolic*              | 146.8 ± 21.8          | 140.8 ± 21.7 | 134.8 ± 17.0 | 133.8 ± 17.1        | 143.9 ± 20.6       | 138.8 ± 20.0 | 133.1 ± 15.9 | 127.3 ± 15.9        |
| Diastolic**            | 82.3 ± 12.0           | 81.1 ± 12.0  | 77.3 ± 10.0  | 77.9 ± 12.2         | 77.9 ± 10.7        | 79.3 ± 11.5  | 76.2 ± 9.7   | 73.2 ± 10.6         |
| <b>Lipids – mg/dl</b>  |                       |              |              |                     |                    |              |              |                     |
| No. evaluated          | n=226                 | n=215        | n=175        | n=94                | n=219              | n=210        | n=174        | n=87                |
| LDL†                   | 97.7 ± 36.6           | 71.7 ± 26.5  | 72.8 ± 26.0  | 68.2 ± 27.5         | 96.3 ± 38.5        | 77.6 ± 28.3  | 75.9 ± 40.9  | 65.6 ± 26.6         |
| HDL†                   | 38.8 ± 10.1           | 39.3 ± 11.6  | 41.9 ± 11.4  | 45.1 ± 13.2         | 37.8 ± 10.6        | 41.8 ± 11.4  | 43.2 ± 13.3  | n=88<br>45.7 ± 12.9 |
| Non-HDL†               | 116.6 ± 40.3          | 89.9 ± 30.0  | 90.9 ± 30.8  | n=93<br>91.4 ± 30.9 | 116.6 ± 43.9       | 96.1 ± 30.4  | 94.3 ± 50.2  | 89.2 ± 28.9         |
| Glycated hemoglobin in |                       |              | 6 Months:    |                     |                    |              | 6 Months:    |                     |

|                                                  |            |            |             |            |            |            |            |            |
|--------------------------------------------------|------------|------------|-------------|------------|------------|------------|------------|------------|
| diabetic patients <sup>§</sup>                   |            |            |             |            |            |            |            |            |
| No. evaluated                                    | n=98       |            | n=47        | n=42       | n=102      |            | n=50       | n=38       |
| Level -%                                         | 8.3 ± 2.3  |            | 7.5 ± 2.0   | 7.2 ± 1.1  | 7.9 ± 2.1  |            | 7.8 ± 2.4  | 7.6 ± 2.0  |
| Weight                                           |            |            | 4 Months:   |            |            |            | 4 Months:  |            |
| No. evaluated                                    | n=227      | n=215      | n=180       | n=108      | n=224      | n=211      | n=170      | n=110      |
| Body Mass Index – Kg/m <sup>2</sup>              | 30.7 ± 6.3 | 30.4 ± 6.3 | 30.4 ± 6.4  | 29.9 ± 5.8 | 30.3 ± 6.2 | 30.3 ± 6.2 | 30.0 ± 6.2 | 29.9 ± 6.2 |
| <b>Lifestyle Factor</b>                          |            |            |             |            |            |            |            |            |
| No. evaluated                                    | n=227      | n=218      | n=181       | n=109      | n=223      | n=212      | n=173      | n=113      |
| Current smoker -%                                | 30         | 21         | 20          | 24         | 24         | 15         | 17         | 19         |
| Moderate or Vigorous<br>Exercise <sup>□</sup> -% | 29         | 44         | n=182<br>57 | 61         | 34         | 43         | 56         | 54         |

Values are mean ± SD or percent of the number evaluated. To convert cholesterol values to millimoles per liter, multiply by 0.02586.

Lipid levels are performed at the Central Lipid Laboratory at baseline, 30 days, and 4 months with direct LDL measurement. Lipid levels at 1 year are performed at the local site and may include LDL values calculated using the Friedewald Equation.

Non-HDL = non-high density lipoprotein which is total cholesterol minus HDL cholesterol or the sum of low density lipoprotein (LDL) plus very low density lipoprotein (VLDL).

\* The comparison between the two groups is significant at 1 year ( $p=0.005$ ), but not at other time points.

\*\* The comparison between the two groups is significant at baseline ( $p<0.001$ ) and 1 year ( $p=0.003$ ), but not at other time points.

† The comparison between the two groups is significant at 30 days (LDL  $p=0.03$ , non-HDL  $p=0.03$ ; HDL  $p=0.02$ ), but not at other time points.

§ According to the American Diabetes Association 2010 definition of diabetes. Values were not required at 30 days or 4 months.

□ defined by a PACE score of 4-8 with 4 defined by vigorous exercise less than 3 times per week or moderate exercise less than 5 times per week, and 8 defined by vigorous exercise at least 3 days a week for at least the last 6 months. Examples of moderate exercise are brisk walking, gardening, slow cycling that lasts at least 10 minutes. Examples of vigorous exercise are jogging, running, fast cycling that lasts at least 20 minutes.
